# Supplementary material for: Isolation, characterization and pharmacological investigations of secondary metabolites from Aspergillus ficuum via experimental and computational techniques
Source: Royal Society of Chemistry journal article supplement (doi:10.1039/d4ra03674c), 2024-01-01
Supplement: d4ra03674c3.pdf [file d4ra03674c3.pdf]

## Supplementary Materials

### Isolation, Characterization and Pharmacological Investigations of secondary metabolites from *Aspergillus ficuum* via Experimental and Computational Techniques

Zafar Ali Shah<sup>1</sup>, Khalid Khan<sup>1\*</sup>, Tanzeel Shah<sup>2</sup>, Nasir Ahmad<sup>1</sup>, Asad Khan<sup>1</sup>

<sup>1</sup>Department of Chemistry, Islamia College University, Peshawar, Khyber Pakhtunkhwa, Pakistan

<sup>2</sup>Institute of Basic Medical Sciences, Khyber Medical University, Peshawar, Khyber Pakhtunkhwa, Pakistan

\*Corresponding authors: drkhalidchem@yahoo.com (K. Khan)

#### Table of Contents

1. **Figure S1:** <sup>1</sup>HNMR spectrum of Compound 1
2. **Figure S2:** <sup>13</sup>CNMR spectrum of Compound 1
3. **Figure S3:** HSQC spectrum of Compound 1
4. **Figure S4:** COSY spectrum of Compound 1
5. **Figure S5:** HMBC spectrum of Compound 1
6. **Figure S6:** <sup>1</sup>HNMR spectrum of Compound 2
7. **Figure S7:** <sup>13</sup>CNMR spectrum of Compound 2
8. **Figure S8:** Random pictures of *In vivo* anti-inflammatory activity
9. **Figure S9:** Random pictures of *In vivo* analgesic activity

## Spectra of Compound 1

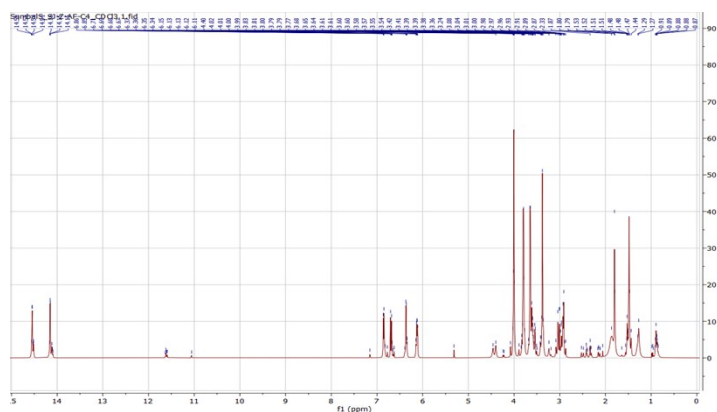

Figure S1: <sup>1</sup>H NMR spectrum of Compound 1

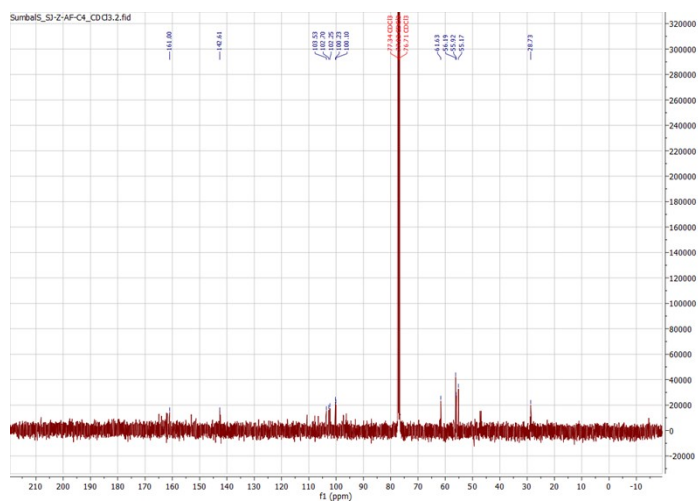

Figure S2: <sup>13</sup>C NMR spectrum of Compound 1

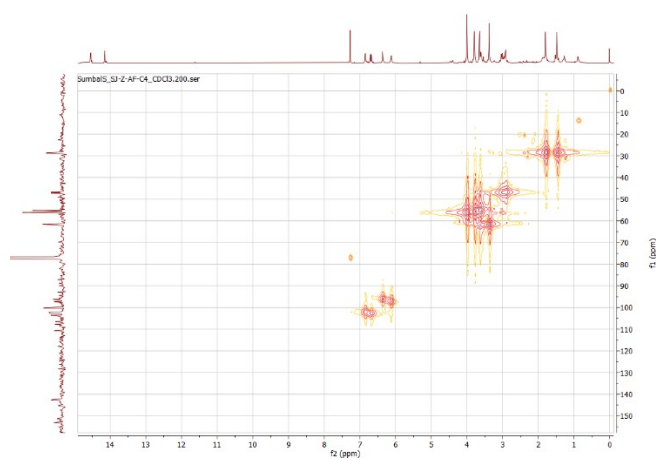

Figure S3: HSQC spectrum of Compound 1

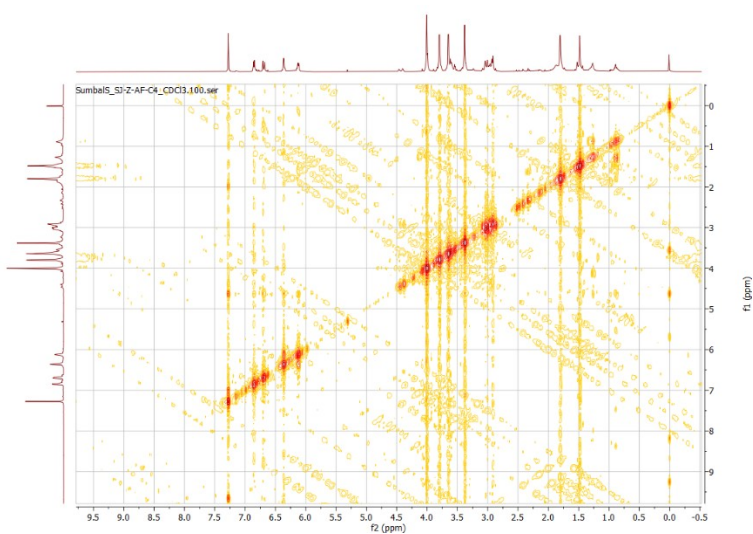

**Figure S4:** COSY spectrum of Compound 1

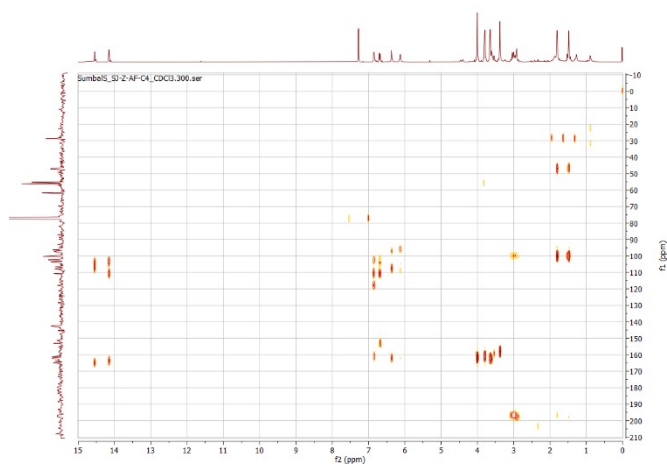

**Figure S5:** HMBC spectrum of Compound 1

### Spectra of Compound 2

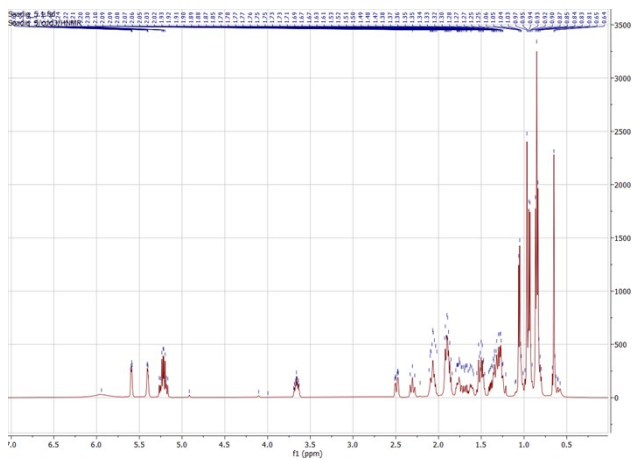

**Figure S6:** <sup>1</sup>H NMR spectrum of Compound 2

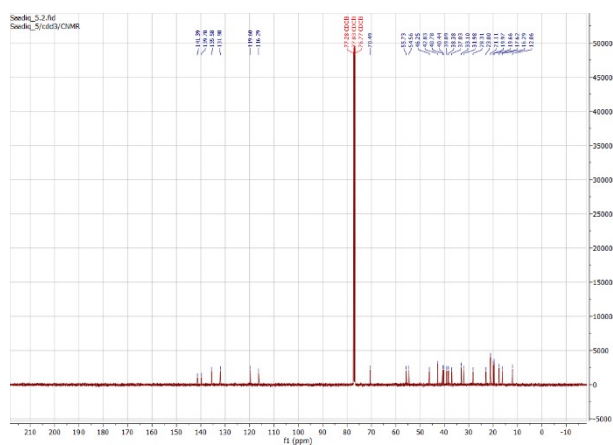

**Figure S7:**  $^{13}\text{C}$ NMR spectrum of Compound 2

**In vivo activities**

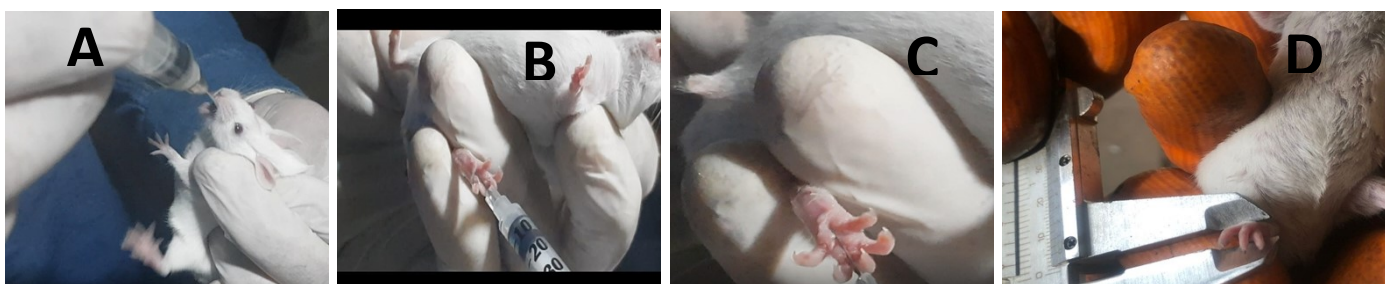

**Figure S8.** (A) Oral administration of Compounds, (B) administration of carrageenan in paw, (C, D) measurement of Paw edema at regular intervals

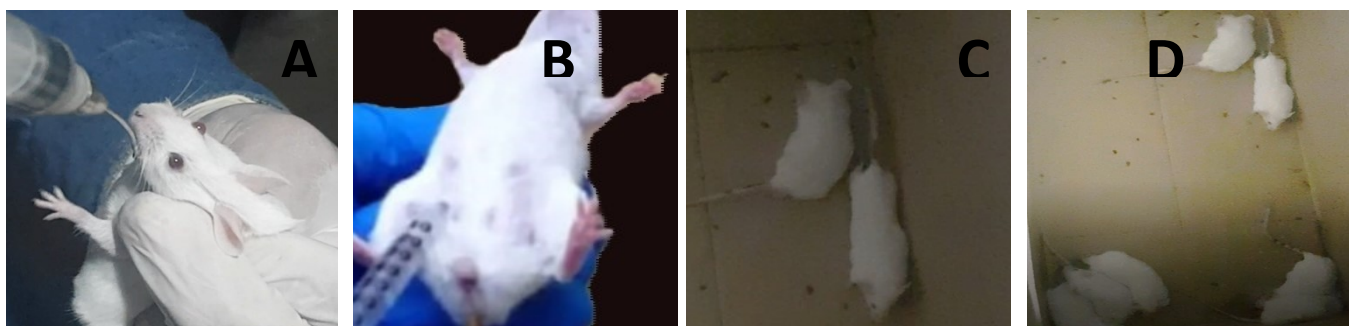

**Figure S9.** (A) Oral administration of Compounds, (B) Intraperitoneal administration of acetic acid (C, D) observance of decrease in writhing at regular intervals
