# Supplementary figures and images for: Isolation, characterization and pharmacological investigations of secondary metabolites from Aspergillus ficuum via experimental and computational techniques
Source: Royal Society of Chemistry journal article supplement (doi:10.1039/d4ra03674c), 2024-01-01

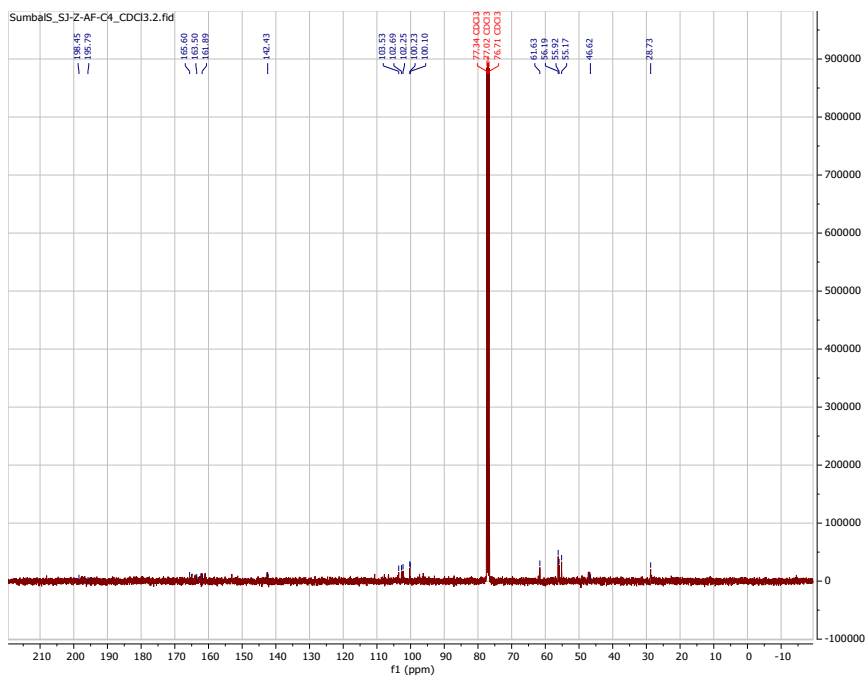

Figure S2:  $^{13}\text{C}$ NMR spectrum of Compound 1

Supplement: d4ra03674c2.pdf [file d4ra03674c2.pdf]
